# Supplementary material
Source: PubMed Central journal article supplement (PMC2844172)
Supplement: supp_M109.038240_Giroud_JBC___Supporting_information.pdf [file supp_M109.038240_Giroud_JBC___Supporting_information.pdf]

# SUPPORTING INFORMATION

## Role of Arginine Guanidinium Moiety in Nitric Oxide Synthase Mechanism of Oxygen Activation

Claire Giroud\*, Magali Moreau\*, Tony A. Mattioli<sup>†</sup>, Véronique Balland<sup>Φ</sup>, Jean-Luc Boucher\*, Yun Xu\*,  
Dennis J. Stuehr, and Jérôme Santolini<sup>†</sup>

<sup>†</sup> iBiTec-S; LSOD, C. E. A. Saclay; 91191 Gif-sur-Yvette Cedex; France

\*UMR 8601 CNRS, University Paris Descartes, 45 rue des Saints Peres, 75270 Paris, France  
Lerner Research Foundation, Cleveland Clinic, Cleveland, OH, USA

<sup>Φ</sup>Laboratoire d'Electrochimie Moléculaire, University Paris Diderot, UMR 7591, 15 rue J.-A. de Baïf,  
75205 Paris cedex 13, France

Corresponding author: Jérôme Santolini. iBiTec-S; LSOD, C. E. A. Saclay; 91191 Gif-sur-Yvette Cedex;  
France. Fax: 33 - 1 - 69088717. Email: jerome.santolini@cea.fr

**Figure S1: Effect of L-Arg analogues binding on Fe<sup>III</sup> iNOS<sub>oxy</sub> resonance Raman spectra.** Panels A and B display the low- and high-frequency regions of RR spectra, respectively, of Fe<sup>III</sup>iNOS<sub>oxy</sub> in the presence of representative compounds. In panel A, curves were fitted to Gaussian functions. Experiments were achieved in the presence of H<sub>4</sub>B, except for the (-/-) experiment that was achieved in the absence of both analogue and H<sub>4</sub>B. Excitation wavelength was 363.8 nm and full protocol is described under Experimental Section.

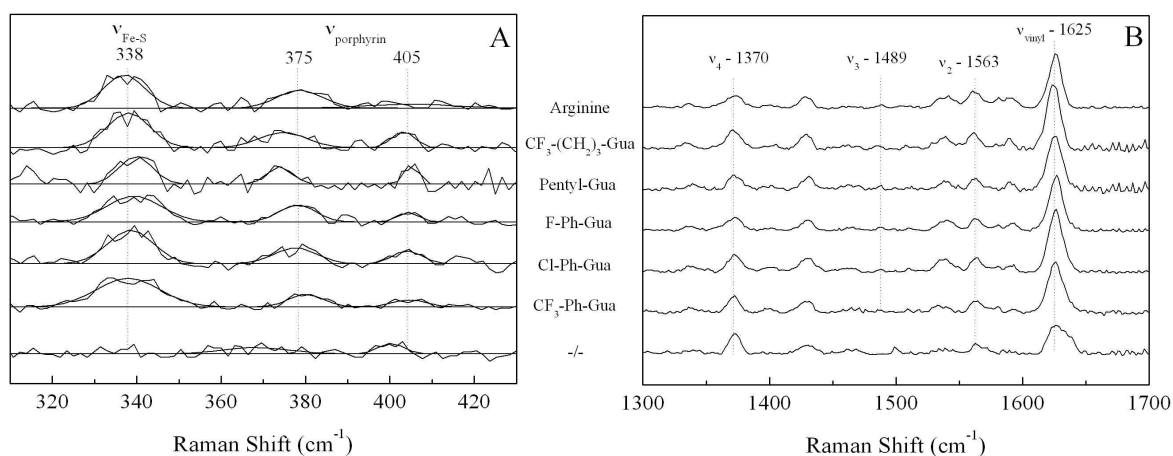

**Figure S2: Effect of L-Arg analogues binding on iNOSoxy Fe<sup>II</sup>CO resonance Raman spectra.** Panels A and B display the low- and high-frequency regions of resonance Raman spectra, respectively. Excitation wavelength was 441.6 nm. Experiments were achieved in the presence of H<sub>4</sub>B, except for the (-/-) experiment that was achieved in the absence of both L-Arg analogues and H<sub>4</sub>B as described under Experimental Section. Stars denote peaks associated with photo-dissociation.

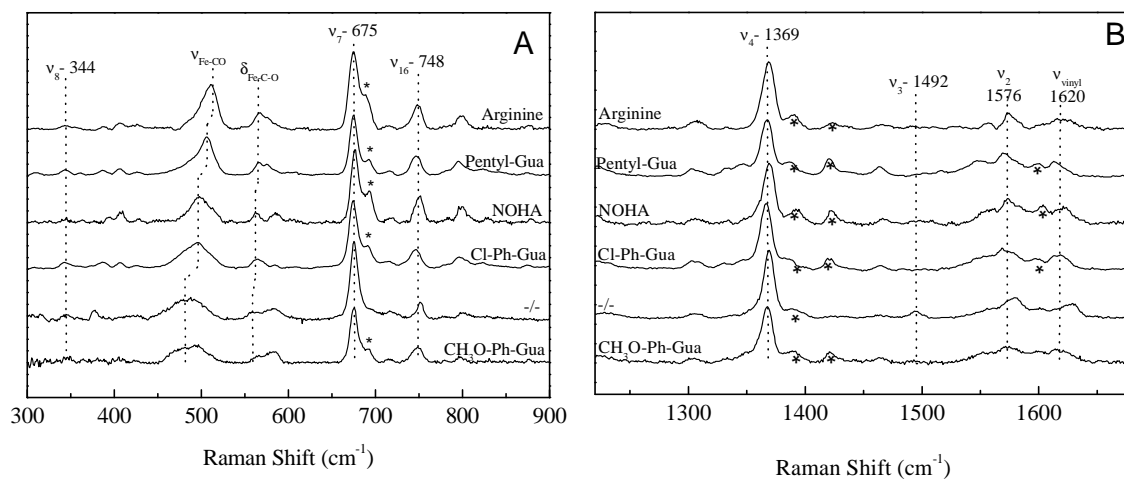

**Table S1: pK<sub>a</sub> values of L-Arg and various guanidines measured in water at 25°C.** Detailed protocol is described under Experimental Section.

| Compound                                                        | field parameter<br>$\sigma_I$ | pK <sub>a</sub><br>measured | pK <sub>a</sub><br>estimated | Ref  |
|-----------------------------------------------------------------|-------------------------------|-----------------------------|------------------------------|------|
| L-Arg                                                           | 0.03                          | 12.48                       |                              | (52) |
| Pentyl-Gua <b>3</b>                                             | 0.01                          | -                           | 12,6                         | (a)  |
| CH <sub>2</sub> F-(CH <sub>2</sub> ) <sub>3</sub> -Gua <b>2</b> | 0.05                          | -                           | 12,1                         | (a)  |
| CF <sub>3</sub> -(CH <sub>2</sub> ) <sub>3</sub> -Gua <b>1</b>  | 0.07                          | -                           | 11,8                         | (a)  |
| Cyclopropyl-Gua <b>4</b>                                        | 0.07                          | -                           | 11,8                         | (a)  |
| Ph-Gua                                                          | 0.12                          | 10.8                        |                              | (a)  |
| Ph-Gua                                                          |                               | 10.77                       |                              | (49) |
| CH <sub>3</sub> OPh-Gua <b>5</b>                                | 0.13                          | 11.0                        |                              | (a)  |
| FPh-Gua <b>6</b>                                                | 0.17                          | 10.8                        |                              | (a)  |
| ClPh-Gua <b>7</b>                                               | 0.18                          | 10.3                        |                              | (a)  |
| CF <sub>3</sub> Ph-Gua <b>8</b>                                 | 0.19                          | 10.0                        |                              | (a)  |
| NO <sub>2</sub> Ph-Gua <b>9</b>                                 | 0.26                          | 9.3                         |                              | (a)  |
| NO <sub>2</sub> Ph-Gua <b>9</b>                                 |                               | 9.13                        |                              | (62) |

(a) : this work

**Table S2: Heme midpoint potentials of iNOSoxy in the presence of various guanidines.**  
 All experiments were achieved in the presence of H<sub>4</sub>B as described under Experimental Section.

| Compound                                                        | $\lambda_{\text{Soret}}$ (nm) | $E^{0'}$ (mV) vs NHE     | Ref  |
|-----------------------------------------------------------------|-------------------------------|--------------------------|------|
| L-Arg                                                           | 397                           | - 270 ± 5                | (a)  |
| L-Arg                                                           | 396                           | - 263                    | (63) |
| CF <sub>3</sub> -(CH <sub>2</sub> ) <sub>3</sub> -Gua <b>1</b>  | 395                           | - 265 ± 5                | (a)  |
| CH <sub>2</sub> F-(CH <sub>2</sub> ) <sub>3</sub> -Gua <b>2</b> | 397                           | - 267 ± 5                | (a)  |
| Cyclopropyl-Gua <b>4</b>                                        | 398                           | - 269 ± 5                | (a)  |
| CH <sub>3</sub> OPh-Gua <b>5</b>                                | 399                           | - 269 ± 5                | (a)  |
| FPh-Gua <b>6</b>                                                | 398                           | - 262 ± 5                | (a)  |
| SEITU                                                           | 396                           | < - 305                  | (a)  |
| SEITU                                                           | 398                           | - 322                    | (63) |
| L-NAME                                                          | 400                           | - 500 < $E^{0'}$ < - 305 | (a)  |
| L-NAME                                                          | 400                           | < - 460                  | (63) |

(a) : this work

**Table S3: Porphyrin and Fe-S vibration modes of ferric iNOSoxy in the presence of various L-Arg analogues.** NOS experiments were achieved in the presence of H<sub>4</sub>B, except for the (-/-) experiment which was achieved in the absence of both analogues and H<sub>4</sub>B. Data were obtained with a laser excitation at 363.8 nm as described under Experimental Section. Frequencies are reported in cm<sup>-1</sup>.

| Protein | L-Arg analogues                                                | $\nu_{\text{Fe-S}}$ | $\gamma_{12}$ | $\nu_7$ | $\nu_{16}$ | $\nu_4$ | $\nu_3$ | $\nu_2$ | $\nu_{\text{vinyl}}$ | Ref  |
|---------|----------------------------------------------------------------|---------------------|---------------|---------|------------|---------|---------|---------|----------------------|------|
| iNOSoxy | L-Arg                                                          | 337                 | 498           | 676     | 754        |         |         |         |                      | (65) |
|         | L-Arg                                                          | 337                 | 495           | 675     | 753        | 1372    | 1489    | 1562    | 1625                 | (a)  |
|         | CF <sub>3</sub> -(CH <sub>2</sub> ) <sub>3</sub> -Gua <b>1</b> | 337                 | 498           | 674     | 753        | 1371    | 1486    | 1562    | 1624                 | (a)  |
|         | Pentyl-Gua <b>3</b>                                            | 339                 | 499           | 675     | 753        | 1372    | 1487    | 1562    | 1625                 | (a)  |
|         | F-Ph-Gua <b>6</b>                                              | 339                 | 498           | 675     | 754        | 1372    | 1488    | 1562    | 1627                 | (a)  |
|         | Cl-Ph-Gua <b>7</b>                                             | 339                 | 498           | 675     | 751        | 1371    | 1486    | 1560    | 1625                 | (a)  |
|         | CF <sub>3</sub> -Ph-Gua <b>8</b>                               | 338                 | 495           | 675     | 752        | 1372    | 1487    | 1563    | 1626                 | (a)  |
|         | -/-                                                            | nd                  | 496           | 676     | 751        | 1373    | -       | 1562    | 1626                 | (a)  |
| eNOS    | L-Arg                                                          | 338                 |               | 678     |            | 1370    | 1489    | 1563    | 1625                 | (64) |
| bsNOS   | L-Arg                                                          | 342                 | 498           | 676     | 754        |         |         |         |                      | (65) |
| P450    | Camphor                                                        | 351                 |               | 677     | 756        | 1368    | 1488    | 1570    | 1623                 | (67) |

(a) : this work.

**Table S4: Porphyrin vibration modes for iNOSoxy Fe<sup>II</sup>-CO complexes in the presence of L-Arg analogues.** Detailed protocol is described under the Experimental Section. All experiments were achieved in the presence of H<sub>4</sub>B, except for the (-/-) experiment that is achieved in the absence of both L-Arg analogues and H<sub>4</sub>B. Data were obtained with a laser excitation at 441.6 nm. Frequencies are given in cm<sup>-1</sup>.

| Protein | Compound | $\nu_8$ | $\nu_7$ | $\nu_{16}$ | $\nu_4$ | $\nu_3$ | $\nu_2$ | $\nu_{10}$ | $\nu_{\text{vinyl}}$ | Ref  |      |
|---------|----------|---------|---------|------------|---------|---------|---------|------------|----------------------|------|------|
| iNOSoxy | L-Arg    | 344     | 674     | 748        | 1369    | 1492    | 1576    | 1601       | 1620                 | (a)  |      |
|         | <b>3</b> | 340     | 678     | 750        | 1367    | 1463    | 1569    | 1600       | nd                   | (40) |      |
|         | <b>1</b> | 340     | 678     | 750        | 1367    | 1463    | 1569    | 1600       | nd                   | (40) |      |
|         | <b>4</b> | nd      | 675     | 748        | 1367    | 1492    | 1573    | 1597       | 1617                 | (a)  |      |
|         | NOHA     | 344     | 676     | 750        | 1369    | 1491    | 1575    | 1603       | 1622                 | (a)  |      |
|         | <b>6</b> | 340     | 678     | 750        | 1367    | 1463    | 1569    | 1600       | nd                   | (40) |      |
|         | <b>7</b> | 340     | 678     | 750        | 1367    | 1463    | 1569    | 1600       | nd                   | (40) |      |
|         | <b>8</b> | 343     | 676     | 750        | 1368    | 1492    | 1575    | 1600       | 1622                 | (a)  |      |
|         | -/-      | 345     | 675     | 751        | 1369    | 1495    | 1579    | 1601       | 1628                 | (a)  |      |
|         | <b>5</b> | 346     | 675     | 748        | 1367    | nd      | 1575    | 1598       | 1617                 | (a)  |      |
|         | <b>9</b> | 345     | 676     | 749        | 1368    | nd      | 1576    | 1599       | 1619                 | (a)  |      |
|         | nNOS     | L-Arg   | 345     | 676        | 752     | 1369    | 1493    | 1572       | 1602                 | 1618 | (58) |
|         |          | NOHA    | 345     | 676        | 751     | 1369    | 1493    | 1572       | 1602                 | 1618 | (58) |
| -/-     |          | 343     | 676     | 751        | 1369    | 1493    | 1572    | 1602       | 1618                 | (58) |      |
| saNOS   | L-Arg    | 344     | 676     | 751        | 1370    | 1495    | 1573    | 1603       | 1622                 | (55) |      |
|         | -/-      | 344     | 676     | 751        | 1370    | 1489    | 1573    | 1600       | 1626                 | (55) |      |
| P450    | Camphor  | 352     | 676     | 749        | 1371    | 1497    | 1588    | nd         | nd                   | (67) |      |
|         | -        | 348     | 677     | 754        | 1372    | 1498    | 1583    | nd         | 1626                 | (67) |      |

(a) : this work.
